# Supplementary material for: Generation of lysolipin derivatives by genetic engineering
Source: Frontiers journal article supplement (doi:10.3389/fchbi.2024.1445095), 2024-07-31
Supplement: Data_Sheet_1.pdf [file Data_Sheet_1.pdf]

## Generation of lysolipin derivatives by genetic engineering

Helene Robertsen<sup>1,2</sup>, Sabrina Rohrer<sup>1</sup>, Andreas Kulik<sup>1</sup>, Wolfgang Wohlleben<sup>1,2,3\*</sup>,  
Yvonne Mast<sup>1,2,4,5,6\*</sup>

<sup>1</sup>Department of Microbiology/Biotechnology, Interfaculty Institute of Microbiology and Infection Medicine, Faculty of Science, University of Tübingen, Auf der Morgenstelle 28, D-72076 Tübingen, Germany

<sup>2</sup>German Center for Infection Research (DZIF), Partner Site Tübingen, Tübingen, Germany

<sup>3</sup>Cluster of Excellence 'Controlling Microbes to Fight Infections' (CMFI), University of Tübingen, Tübingen, Germany

<sup>4</sup>Department Bioresources for Bioeconomy and Health Research, Leibniz Institute DSMZ -German Collection of Microorganisms and Cell Cultures, Inhoffenstraße 7B, 38124 Braunschweig, Germany

<sup>5</sup>Braunschweig Integrated Centre of Systems Biology (BRICS), Rebenring 56, 38106 Braunschweig, Germany

<sup>6</sup>Technische Universität Braunschweig, Institut für Mikrobiologie, Rebenring 56, 38106 Braunschweig, Germany

\*Correspondence:  
Prof. Dr. Yvonne Mast  
yvonne.mast@dsmz.de

Prof. Dr. Wolfgang Wohlleben  
Wolfgang.wohlleben@biotech.uni-tuebingen.de

Running title: Novel lysolipin derivatives

Key words: actinomycetes, *Streptomyces*, antibiotic, polyketides, lysolipin, genetic engineering

**Table S1:** Media receipt for lysolipin production media NL800 and E1. All data refer to 1 LH<sub>2</sub>O<sub>deion.</sub>

| Medium | Ingredients                                                                                                                                                                                                                  | pH  |
|--------|------------------------------------------------------------------------------------------------------------------------------------------------------------------------------------------------------------------------------|-----|
| NL800  | 5 g glucose<br>10 g glycerin<br>10 g soluble starch<br>5 g soy flour full fat<br>2 g yeast extract<br>1 g NaCl<br>1 g CaCO <sub>3</sub>                                                                                      | 7.2 |
| E1     | 20 g glucose<br>20 g soluble starch<br>5 g yeast extract<br>2.5 g pharmamedia<br>1 g MgSO <sub>4</sub> x 7H <sub>2</sub> O<br>1.3 g KH <sub>2</sub> PO <sub>4</sub> x 3H <sub>2</sub> O<br>5 g NaCl<br>5 g CaCO <sub>3</sub> | 7.5 |

**Table S2:** Oligonucleotides used in this study. MunI restriction site is highlighted by bold letters.

| Primer designation | Primer sequence (5'-3')                                                        |
|--------------------|--------------------------------------------------------------------------------|
| IlpRI-CmR.MunI-F   | TTGATTAGTCACGCCGCACCTAGTAGCCTGGCAACTATG <b>CAATTG</b> GACGTCTA<br>AGAAACCATTAT |
| IlpRI-CmR.MunI-R   | GCCGGTTCCATCCCCGTCGGCTGGCCGGCGCGGGTCTC <b>ACAATTG</b> TACGCC<br>CCGCCCTGCCAC   |

**Table S3:** Bioactivity profile of lysolipin I and its derivatives as reported in patent WO/2007/079715. Improved bioactivities are highlighted in bold.

| Lysolipin (derivative) | MIC ( $\mu\text{g/mL}$ )<br>( <i>E. coli</i> ATCC10536) | Cytotoxicity (IC <sub>50</sub> , [M])<br>(THP-1 (human lymphoblast)) |
|------------------------|---------------------------------------------------------|----------------------------------------------------------------------|
| Lysolipin I (CBS42)    | 128                                                     | 9.39E-09                                                             |
| <b>CBS40</b>           | <b>3</b>                                                | 2.16E-08                                                             |
| CBS44                  | 128                                                     | 1.16E-07                                                             |
| CBS48                  | 128                                                     | 2.08E-07                                                             |
| <b>CBS49</b>           | <b>30</b>                                               | 3.44E-07                                                             |
| <b>CBS68</b>           | 128                                                     | <b>1.58E-07</b>                                                      |
| <b>CBS70</b>           | 128                                                     | <b>2.99E-07</b>                                                      |
| CBS72                  | 128                                                     | 4.27E-08                                                             |

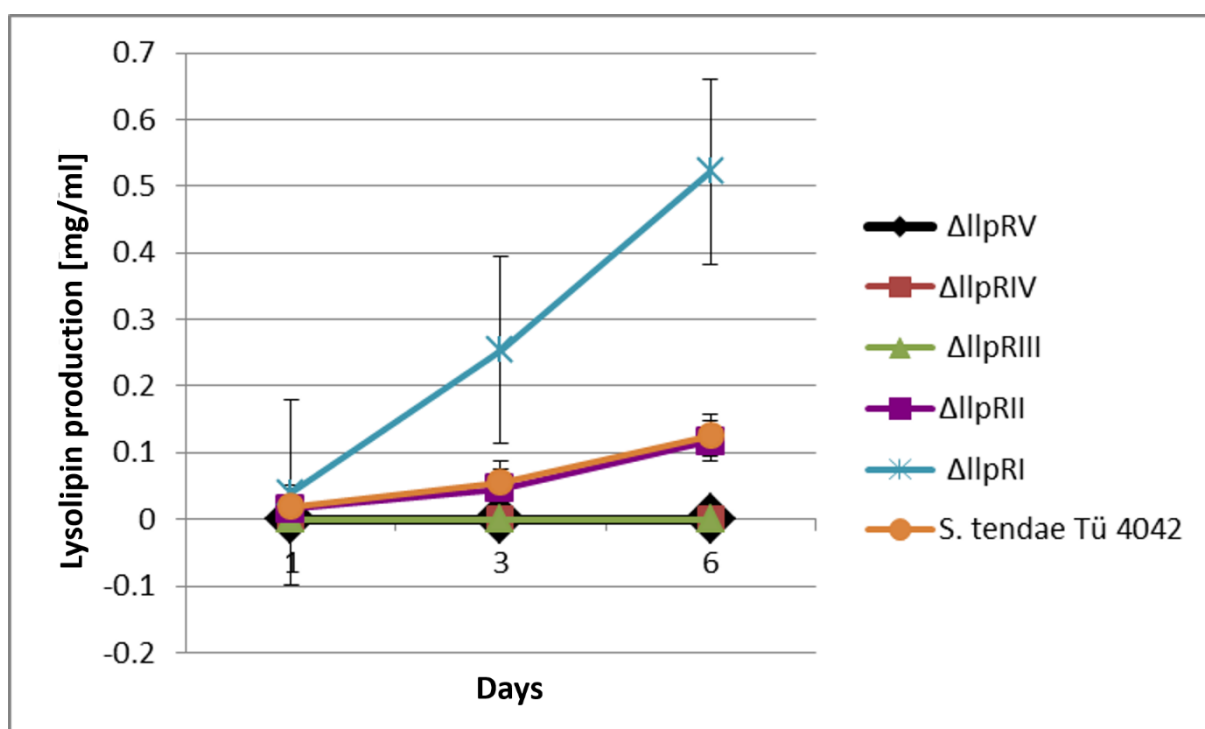

**Figure S1:** Lysolipin I production of *Streptomyces tendae* Tü4042 and transcriptional regulatory mutants *S. tendae*  $\Delta IlpRI$ ,  $\Delta IlpRII$ ,  $\Delta IlpRIII$ ,  $\Delta IlpRIV$ , and  $\Delta IlpRV$ , respectively, according to Rohrer, 2017. Cell cultures were harvested after 1, 2 and 6 days of cultivation in E1 medium. Lysolipin production was analysed by HPLC-MS by using a

lysolipin calibration curve. Results are shown from three independent biological replicates.

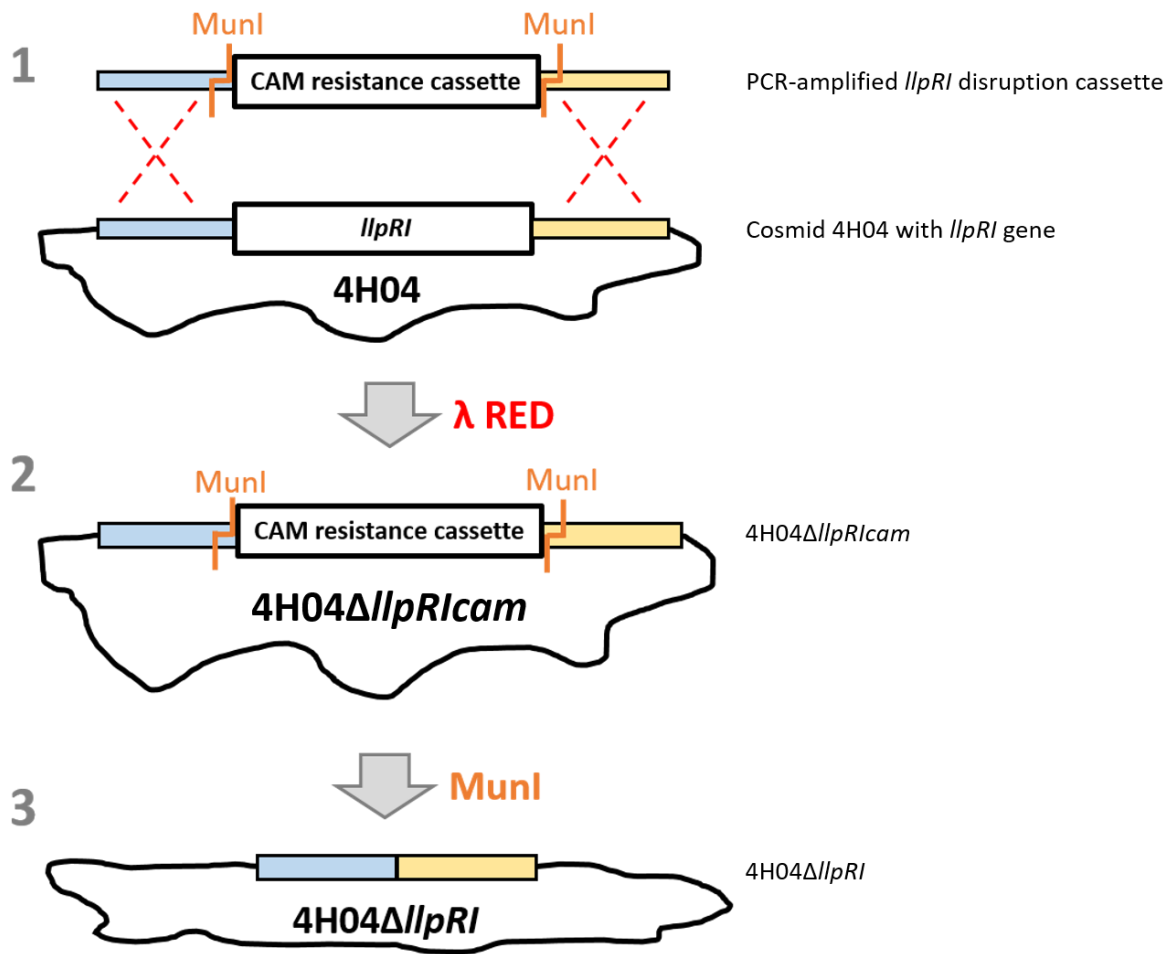

**Figure S2:** Schematic presentation of the cloning procedure to generate construct *4H04ΔllpRI* in *E. coli*. Up- and downstream homologous regions of *llpRI* are indicated in blue and yellow, respectively. *MunI* restriction sites are shown in orange. Homologous recombination events are highlighted as red dashed crosses 1:  $\lambda$ -RED-driven recombination of homologous gene regions by a double crossover event to integrate the PCR-amplified *llpRI* disruption cassette into 4H04; 2: *4H04ΔllpRIcam* with chloramphenicol resistance marker (CAM) and deleted *llpRI* gene; 3: *4H04ΔllpRI* without CAM cassette after restriction with *MunI*, resulting in *llpRI* deletion.

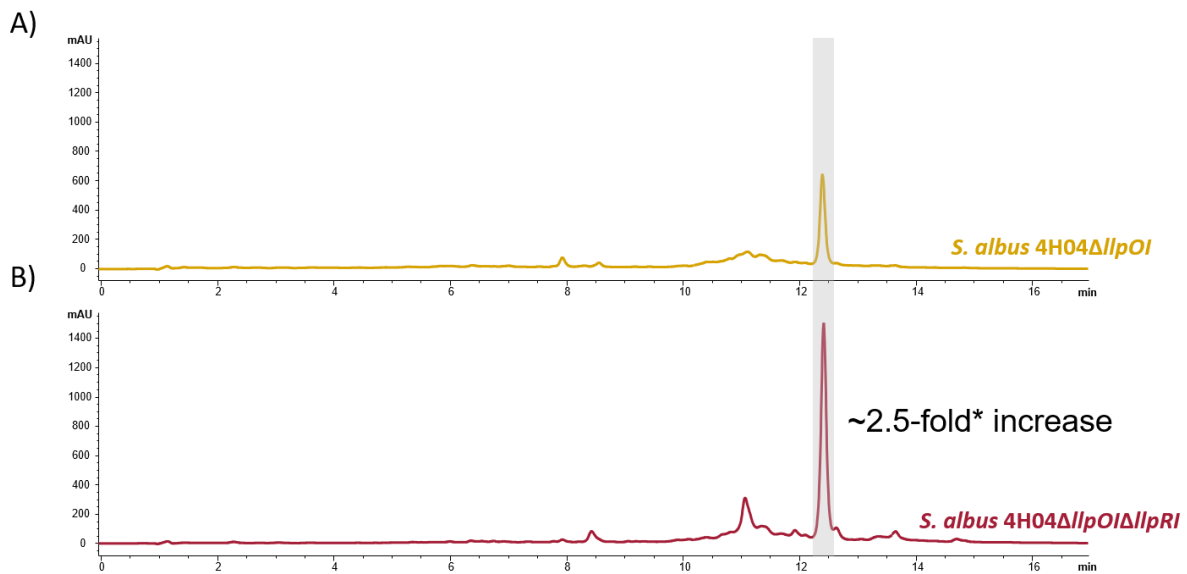

**Figure S3:** HPLC chromatograms of extract samples from A) *S. albus* 4H04ΔllpOI (yellow) and B) *S. albus* 4H04ΔllpOIΔllpRI (red). Peak at RT 12.4 correlates to lysolipin derivative (CBS40) production and is highlighted in grey. Samples were obtained from cultures grown for seven days at 28°C.

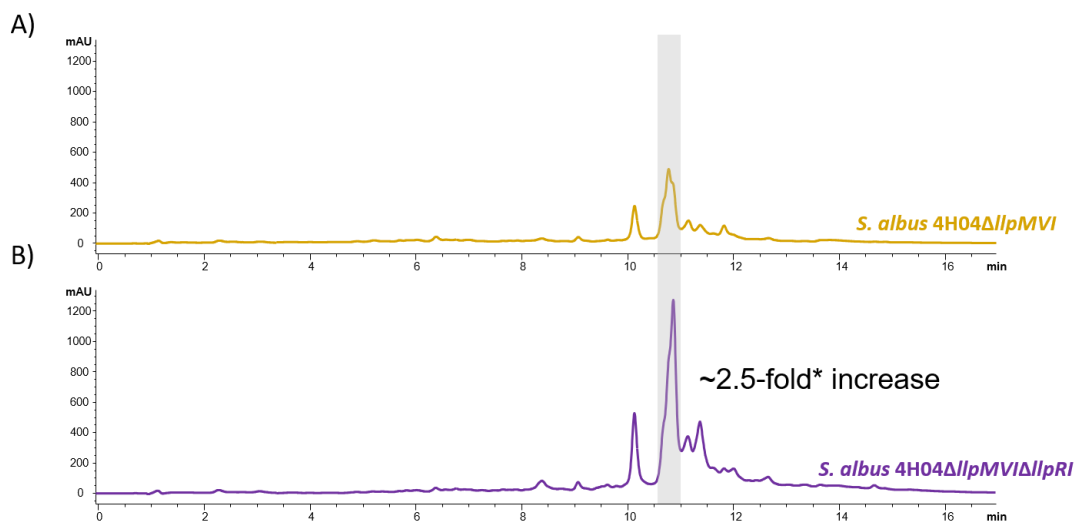

**Figure S4:** HPLC chromatograms of extract samples from A) *S. albus* 4H04ΔllpMVI (yellow) and B) *S. albus* 4H04ΔllpMVIΔllpRI (purple). Peak at RT 10.6 correlates to lysolipin derivatives (CBS 70+72) production and is highlighted in grey. Samples were obtained from cultures grown for seven days at 28°C.

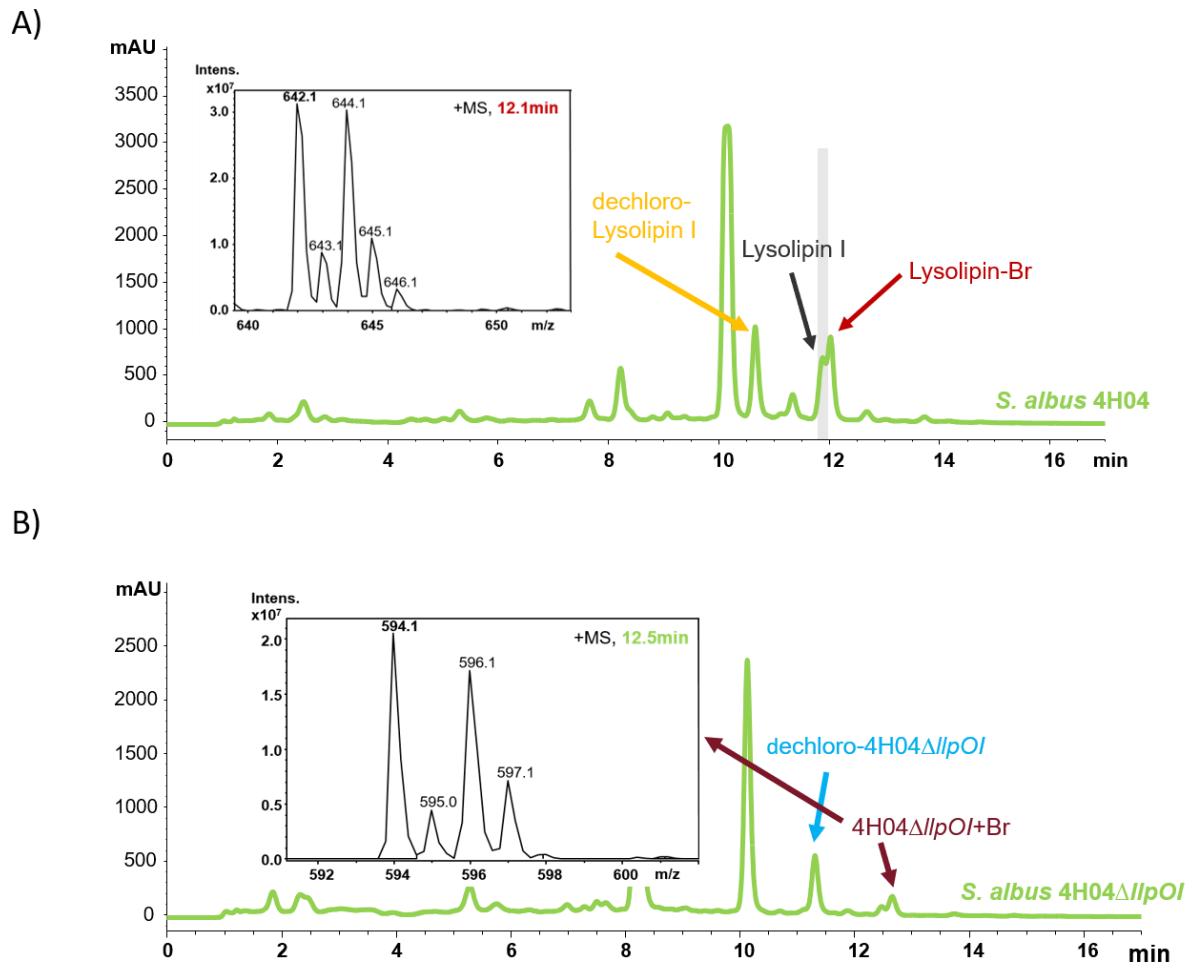

**Figure S5:** HPLC chromatograms of extract samples from A) *S. albus* 4H04 (green) and B) *S. albus* 4H04 $\Delta$ lpOI (green). Peaks correlating to lysolipin I and lysolipin derivatives are highlighted by arrows. MS spectra are shown in black. Samples were obtained from cultures grown for seven days at 28°C.
